# Supplementary material for: Interaction of Nck1 and PERK phosphorylated at Y561 negatively modulates PERK activity and PERK regulation of pancreatic β-cell proinsulin content
Source: PubMed Central journal article supplement — Mol Biol Cell. 2014 Mar 1;25(5):702–11. doi: 10.1091/mbc.E13-09-0511 (PMC3937095; doi:10.1091/mbc.e13-09-0511), 2014-03-01

# Supplemental Materials

*Molecular Biology of the Cell*

Yamani et al.

**Figure S1. PERK Y561F mutation enhances ER stress-induced PERK-mediated p $\text{eIF2}\alpha^{\text{S}51}$ .** *PERK*<sup>-/-</sup> MEFs transiently expressing PERK WT or Y561F mutant were treated 48 hr later with 1 mM DTT for indicated times. Total cell lysates (50  $\mu\text{g}$  protein) were subjected to immunoblotting using indicated antibodies. An inserted black line on PERK immunoblot specifies that PERK WT and Y561F samples were simultaneously processed, but from two different gels (n=3).

**Figure S2. PERK phosphorylation at Y<sup>561</sup> delays PERK activation and signaling in MIN6 cells.** (A) MIN6 cells untreated (lanes 1 and 7) or pretreated with 100  $\mu\text{M}$  PV for 20 min (lanes 2-6 and 8-12) were washed with PBS and then treated with 10 mM DTT (lanes 2-6) or not (lanes 8-12) for indicated times. Total cell lysates (50  $\mu\text{g}$  protein) were subjected to immunoblotting with indicated antibodies. (B) MIN6 cells untreated (lanes 1-5) or pretreated with 100  $\mu\text{M}$  PV for 20 min (lanes 6-10) were washed with PBS and then treated with 10 mM DTT for indicated times. Total cell lysates (50  $\mu\text{g}$  protein) were subjected to immunoblotting with indicated antibodies. (C) Cos-1 cells untreated (-) or pretreated with pbVphen (100  $\mu\text{M}$ , 10 min) were washed with PBS and then untreated (-) or treated with Tg (0.5  $\mu\text{M}$ ) or DTT (0.5 mM) for 20 min. Total cell lysates (50  $\mu\text{g}$  protein) were subjected to immunoblotting using indicated antibodies. Ratios of p $\text{eIF2}\alpha^{\text{S}51}$ /eIF2 $\alpha$  established by densitometry quantification upon normalisation to untreated cells are reported. Data are representative of 3 independent experiments.

**Figure S3. Nck interacts with PERK and modulates PERK activity.** (A) MIN6 cells were pretreated with 100  $\mu\text{M}$  PV for 20 min, then washed and either left untreated (-) or treated with 1  $\mu\text{M}$  Tg for 30 min. Total cell lysates (500  $\mu\text{g}$  protein) were subjected to Nck immunoprecipitation and Nck immunoprecipitates were subjected to immunoblotting with indicated antibodies. Total cell lysates (50  $\mu\text{g}$  protein) were probed by immunoblotting with indicated antibodies. (B) LMP-EV and LMP-shNck1 MIN6 cells were pretreated with 100  $\mu\text{M}$  PV for 20 min, then washed with PBS and either left untreated (-) or treated with 1  $\mu\text{M}$  Tg for 10 min. Total cell lysates (50  $\mu\text{g}$  protein) were subjected to immunoblotting using indicated antibodies. Bar chart shows the ratio of pY<sup>561</sup> PERK determined by densitometry in Tg-treated compared to untreated cells. Data are mean  $\pm$  SEM ( $*P<0.007$ ) and are representative of 3 independent experiments.

**Figure S4. Overexpression of PERK modulates proinsulin levels in MIN6 cells.** Total cell lysates (50  $\mu\text{g}$  protein) from MIN6 cells transiently transfected with empty vector (Mock) or increasing amounts of plasmid encoding PERK WT were subjected to immunoblotting with indicated antibodies. Bar chart shows densitometry of proinsulin levels. Data are mean  $\pm$  SEM ( $*P<0.001$ ). Data are representative of 3 independent experiments.

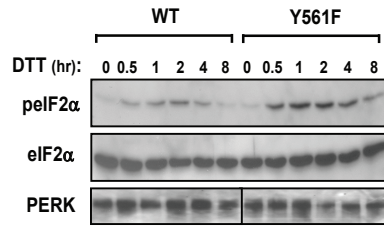

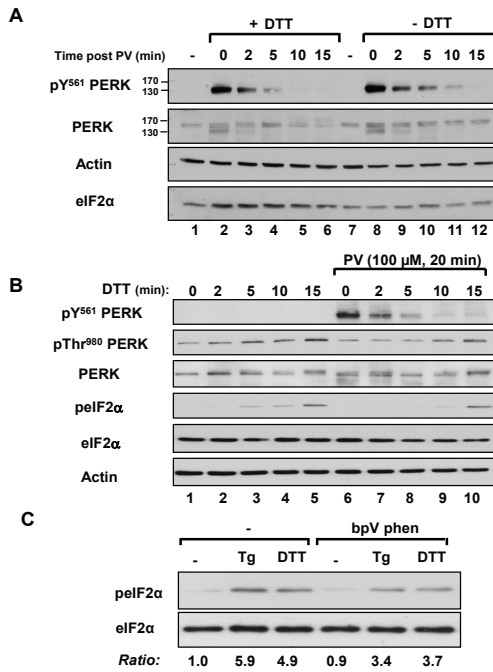



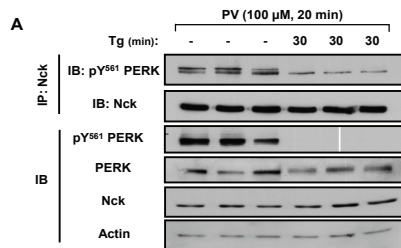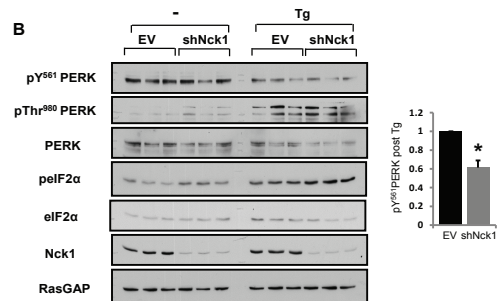

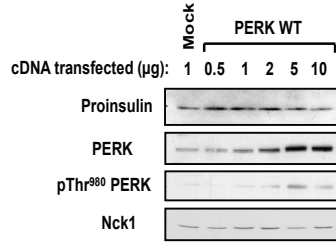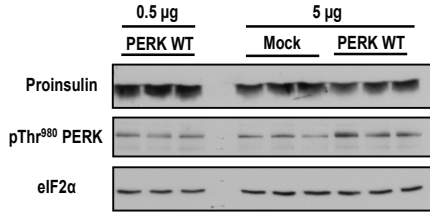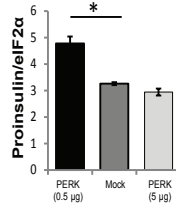

Supplement: supp_E13-09-0511v1_CombinedSupMats.pdf [file supp_E13-09-0511v1_CombinedSupMats.pdf]
